# Supplementary material
Source: HighWire-hosted journal article supplement (https://jnm.snmjournals.org/highwire/filestream/94427/field_highwire_adjunct_files/0/112490_Supplemental_Data.pdf)
Supplement: 112490_Supplemental_Data.pdf [file 112490_Supplemental_Data.pdf]

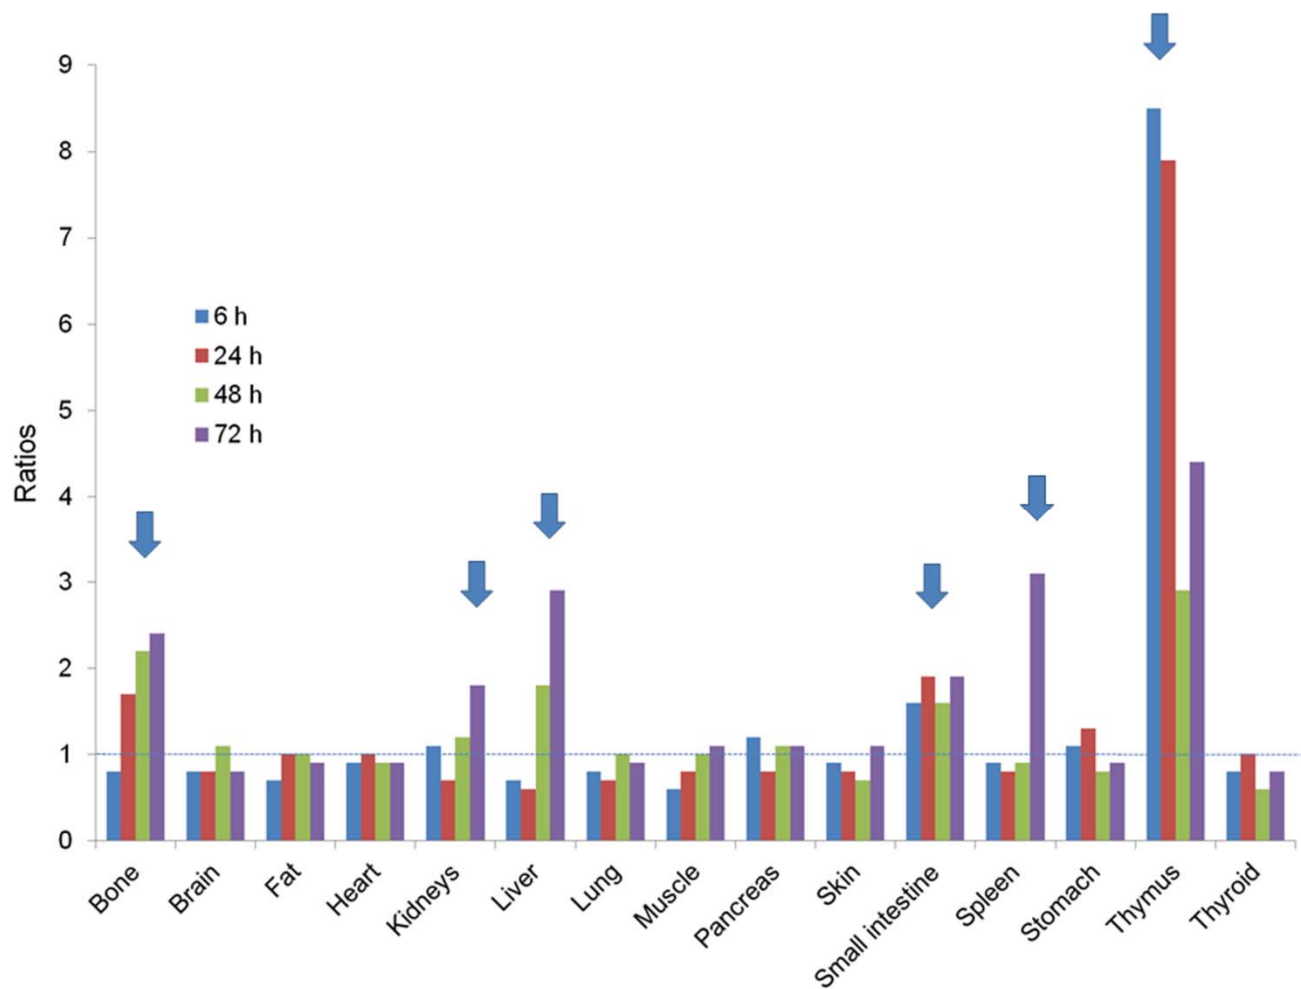

Supplemental Figure 1. Ratios of mean radioactivity uptake between irradiated and control as a function of time in different organs/tissues. A ratio of 1 (dotted line) indicates no change. Tissues that experienced significant elevation in radioactivity uptake are highlighted with block arrows. These tissues correspond to those with statistical significance in Figure 6. Note: the current figure serves as a visual illustration of relative changes in folds. Since the values are derived as ratios of means, they do not carry standard deviations.

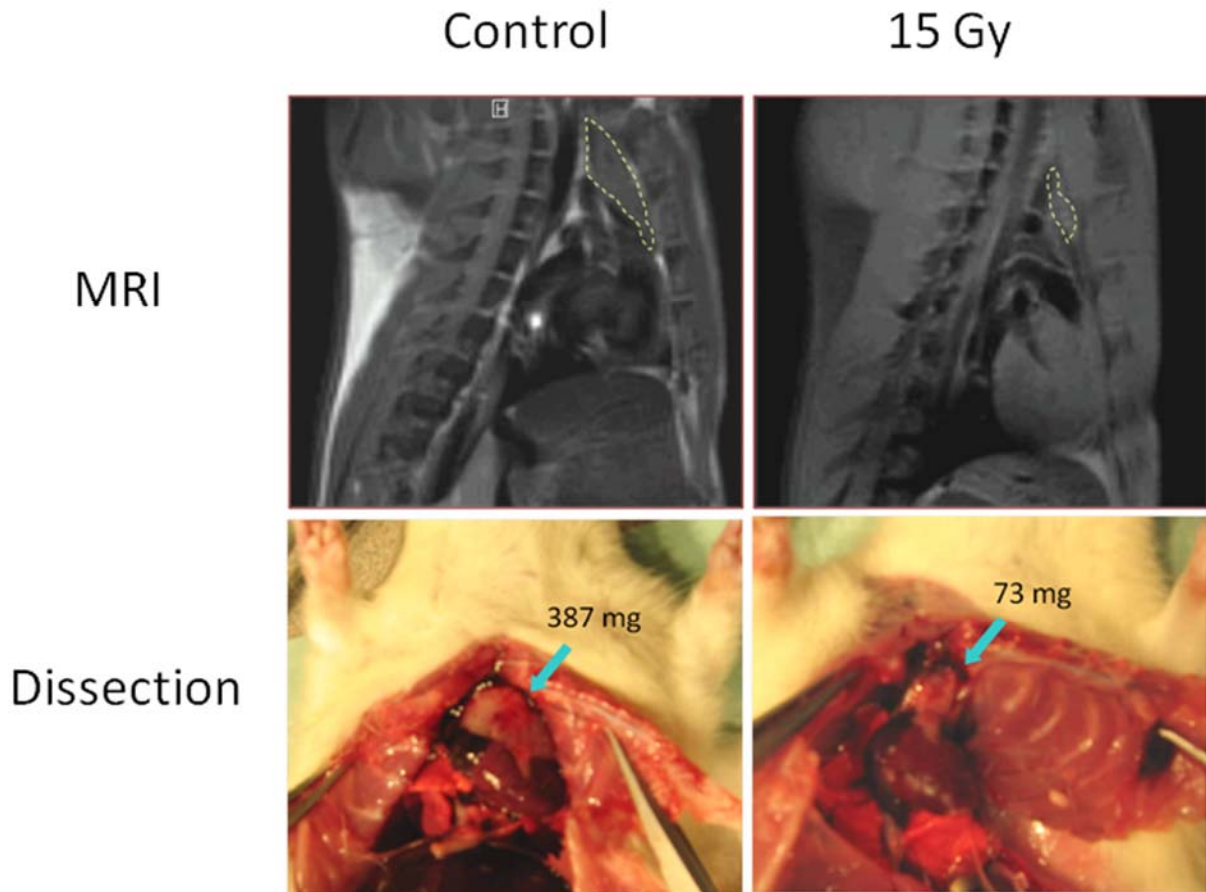

Supplemental Figure 2. Thymic atrophy after ionizing irradiation. Top panels: Sagittal thoracic MRI of control (left) and 72 hours post-irradiated (right) animals. The contour of the thymus is marked with dotted lines. Bottom panels: Photographs of the thymus in control (left) and 72 hours post-irradiated (right) animals. The thymus is marked with arrows.

**Supplemental Table 1.** Radioactivity Uptake in Organs/Tissues at Different Time Points

| Organs/Tissues  | Control<br>(%ID/g) | 6 h<br>(%ID/g)     | 24 h<br>(%ID/g)    | 48 h<br>(%ID/g)    | 72 h<br>(%ID/g)    |
|-----------------|--------------------|--------------------|--------------------|--------------------|--------------------|
| Bone            | 0.06 ± 0.03        | 0.05 ± 0.02        | <b>0.11 ± 0.02</b> | <b>0.14 ± 0.03</b> | <b>0.15 ± 0.04</b> |
| Brain           | 0.01 ± 0.01        | 0.01 ± 0.01        | 0.01 ± 0.01        | 0.01 ± 0.01        | 0.01 ± 0.01        |
| Fat             | 0.06 ± 0.02        | 0.04 ± 0.02        | 0.06 ± 0.01        | 0.06 ± 0.01        | 0.05 ± 0.01        |
| Heart           | 0.19 ± 0.06        | 0.17 ± 0.04        | 0.19 ± 0.09        | 0.17 ± 0.10        | 0.17 ± 0.07        |
| Kidneys         | 2.57 ± 0.88        | 2.82 ± 0.79        | 1.80 ± 0.79        | 3.08 ± 0.16        | <b>4.62 ± 0.73</b> |
| Liver           | 0.39 ± 0.12        | 0.27 ± 0.12        | 0.23 ± 0.12        | <b>0.70 ± 0.60</b> | <b>1.13 ± 0.80</b> |
| Lung            | 0.19 ± 0.09        | 0.15 ± 0.09        | 0.13 ± 0.07        | 0.19 ± 0.11        | 0.17 ± 0.11        |
| Muscle          | 0.04 ± 0.01        | 0.03 ± 0.01        | 0.03 ± 0.02        | 0.04 ± 0.02        | 0.05 ± 0.01        |
| Pancreas        | 0.05 ± 0.01        | 0.06 ± 0.03        | 0.04 ± 0.02        | 0.06 ± 0.02        | 0.06 ± 0.01        |
| Skin            | 0.15 ± 0.02        | 0.14 ± 0.03        | 0.12 ± 0.03        | 0.11 ± 0.01        | 0.17 ± 0.03        |
| Small intestine | 0.40 ± 0.11        | <b>0.68 ± 0.19</b> | <b>0.64 ± 0.16</b> | <b>0.72 ± 0.19</b> | <b>0.76 ± 0.22</b> |
| Spleen          | 0.36 ± 0.09        | 0.33 ± 0.09        | 0.29 ± 0.07        | 0.33 ± 0.20        | <b>1.12 ± 0.40</b> |
| Stomach         | 0.09 ± 0.02        | 0.10 ± 0.04        | 0.12 ± 0.07        | 0.07 ± 0.02        | 0.08 ± 0.02        |
| Thymus          | 0.12 ± 0.09        | <b>1.02 ± 0.22</b> | <b>0.96 ± 0.19</b> | <b>0.35 ± 0.11</b> | <b>0.53 ± 0.20</b> |
| Thyroid         | 0.08 ± 0.04        | 0.06 ± 0.02        | 0.08 ± 0.01        | 0.05 ± 0.02        | 0.06 ± 0.04        |

Note: uptake values that are significantly elevated ( $P < 0.05$ ) are highlighted in bold.

**Supplemental Table 2.** Ratios in Terms of  $^{99m}\text{Tc}$ -Duramycin Uptake in Different Tissues/Organs Between Irradiated and Control at Different Time Points

|                 | 6 h        | 24 h       | 48 h       | 72 h       |
|-----------------|------------|------------|------------|------------|
| Bone            | 0.8        | <b>1.8</b> | <b>2.3</b> | <b>2.5</b> |
| Brain           | 0.8        | 0.8        | 1.1        | 0.8        |
| Fat             | 0.7        | 1.0        | 1.0        | 0.9        |
| Heart           | 0.9        | 1.0        | 0.9        | 0.9        |
| Kidneys         | 1.1        | 0.7        | 1.2        | <b>1.8</b> |
| Liver           | 0.7        | 0.6        | <b>1.8</b> | <b>2.9</b> |
| Lung            | 0.8        | 0.7        | 1.0        | 0.9        |
| Muscle          | 0.6        | 0.8        | 1.0        | 1.1        |
| Pancreas        | 1.2        | 0.8        | 1.1        | 1.1        |
| Skin            | 0.9        | 0.8        | 0.7        | 1.1        |
| Small intestine | <b>1.7</b> | <b>1.6</b> | <b>1.8</b> | <b>1.9</b> |
| Spleen          | 0.9        | 0.8        | 0.9        | <b>3.1</b> |
| Stomach         | 1.1        | 1.3        | 0.8        | 0.9        |
| Thymus          | <b>8.5</b> | <b>7.9</b> | <b>2.9</b> | <b>4.4</b> |
| Thyroid         | 0.8        | 1.0        | 0.6        | 0.8        |

Ratio values that are greater than 1.5 are highlighted in bold.
